# Supplementary material for: Synthesis and structure of fluoride-containing GeO2 analogues of zeolite double four-ring building unitsElectronic supplementary information (ESI) available: X-ray diffraction data. See http://www.rsc.org/suppdata/cc/b2/b207374a/
Source: Royal Society of Chemistry journal article supplement (doi:10.1039/b207374a), 2002-09-05
Supplement: b207374a.doc [file b207374a.doc]

**Supplementary information**

**X-ray Diffraction**

**Table 1** Crystallographic details for [DECDMP,F]- D4R

|  | [DECDMP,F]- D4R |
| --- | --- |
| Formula | [Ge8O12(OH)8F](C11NH24) |
| Crystal system | Tetragonal |
| Space group | I-42m (No. 121) |
| a / Å (T = 298K) | 13.7488(4) |
| b / Å | 13.7488(4) |
| c / Å | 7.7446(3) |
| V / Å3 | 1464.0(1) |
| Z | 2 |
| Contributing reflections / 2range | 176 / 5 - 85º |
| No. of variables / restraints | 30 / 18 |
| Rwp / Rp (%) | 15.4 / 11.4 |
|  |  |

**Table 2** Atomic positions and temperature factors for [DECDMP,F]- D4R

| Name | X | Y | Z | Ui/Ue*100 |
| --- | --- | --- | --- | --- |
| Ge1 | .3878(5) | .3878(5) | .2132(9) | 2.09(10) |
| Ge2 | .3812(4) | .3812(4) | -.1993(9) | 2.09(10) |
| O1 | .3484(9) | .3484(9) | .0081(32) | 4.8(4) |
| O2 | .3526(9) | .4995(13) | .2738(16) | 4.8(4) |
| O4 | .3111(15) | .3111(15) | .3308(49) | 4.8(4) |
| O3 | .3011(15) | .3011(15) | .3040(52) | 4.8(4) |
| F1 | .500000 | .500000 | .000000 | 7.4(15) |
| C1 | .000000 | .392538 | .500000 | 10.00 |
| C2 | .086000 | .458000 | .580000 | 10.00 |
| C3 | .086000 | .458000 | .420000 | 10.00 |
| C8 | .000000 | .391000 | .302000 | 10.00 |
| C9 | .000000 | .288000 | .568000 | 10.00 |
| C7 | .060000 | .499000 | .756000 | 10.00 |
| C4 | .060000 | .501000 | .756000 | 10.00 |
| C5 | .182000 | .403000 | .594000 | 10.00 |
| C6 | .182000 | .403000 | .406000 | 10.00 |

Note: The disordered template molecule was placed and not refined.

# Table 3 Selected Bond Distances and angles for [DECDMP,F]- D4R

| [DECDMP,F]- D4R | |
| --- | --- |
| Ge(1) – O(1) 1.76(2) | O(1) – Ge(1) – O(2) 116(1) |
| Ge(1) – O(2) 1.68(2) | O(1) – Ge(1) – O(2) 116(1) |
| Ge(1) – O(2) 1.68(2) | O(1) – Ge(1) – O(4) 96(1) |
| Ge(1) – O(4) 1.75(2) | O(2) – Ge(1) – O(2) 117(1) |
| Ge(1) – F(1) 2.74(1) | O(2) – Ge(1) – O(4) 104(1) |
|  | O(2) – Ge(1) – O(4) 104(1) |
| Ge(2) – O(1) 1.73(2) | O(1) – Ge(2) – O(2) 119(1) |
| Ge(2) – O(1) 1.78(2) | O(1) – Ge(2) – O(2) 119(1) |
| Ge(2) – O(1) 1.78(2) | O(1) – Ge(2) – O(3) 96(1) |
| Ge(2) – O(1) 1.76(2) | O(2) – Ge(2) – O(2) 108(1) |
| Ge(2) – F(1) 2.78(1) | O(2) – Ge(2) – O(3) 107(1) |
|  | O(2) – Ge(2) – O(3) 107(1) |
|  |  |
|  | Ge(1) – O(1) – Ge(2) 133(2) |
|  | Ge(1) – O(2) – Ge(2) 134(2) |
|  |  |

# Figure 1. 13C left of [DECDMP,F]- D4R, which shows the template is intact in the structure. 19F NMR is also shown.
